# Supplementary material
Source: HighWire-hosted journal article supplement (https://bjgpopen.org/highwire/filestream/2721/field_highwire_adjunct_files/0/bjgpopen20X101032_Supp.pdf)

## Figure S1: Example search strategy for MEDLINE

MEDLINE:

- 1 exp "premenstrual syndrome"/
- 2 exp "premenstrual dysphoric disorder"/
- 3 PMS.ti,ab.
- 4 PMDD.ti,ab.
- 5 "premenstrual dysphoric disorder".ti,ab.
- 6 (menstrua\* adj2 tens\*).ti,ab.
- 7 (menstrua\* adj2 symptom\*).ti,ab.
- 8 "premenstrual syndrome".ti,ab.
- 9 or/1-8
- 10 exp exercise/
- 11 exp exercise therapy/
- 12 exp physical fitness/
- 13 exp physical exertion/
- 14 exp running/
- 15 exp swimming/
- 16 exp walking/
- 17 exp tai ji/
- 18 exp yoga/
- 19 exp dancing/
- 20 exp gardening/
- 21 exp sports/
- 22 exerci\*.ti,ab.
- 23 "physical activit\*".ti,ab.
- 24 sport\*.ti,ab.
- 25 stretch\*.ti,ab.
- 26 fitness.ti,ab.
- 27 jog\*.ti,ab.
- 28 running.ti,ab.
- 29 swim\*.ti,ab.
- 30 (cycl\* adj2 train\*).ti,ab.
- 31 walk\*.ti,ab.
- 32 yoga.ti,ab.
- 33 "tai ji".ti,ab.
- 34 "tai chi".ti,ab.
- 35 pilates.ti,ab.
- 36 "physical train\*".ti,ab.
- 37 "resistance train\*".ti,ab.
- 38 athlet\*.ti,ab.
- 39 "weight train\*".ti,ab.
- 40 isometric\*.ti,ab.
- 41 danc\*.ti,ab.
- 42 or/10-41
- 43 9 and 42
- 44 Randomized Controlled Trials as Topic/
- 45 randomized controlled trial/
- 46 Random Allocation/
- 47 Double Blind Method/

48 Single Blind Method/  
49 clinical trial/  
50 clinical trial, phase i.pt.  
51 clinical trial, phase ii.pt.  
52 clinical trial, phase iii.pt.  
53 clinical trial, phase iv.pt.  
54 controlled clinical trial.pt.  
55 randomized controlled trial.pt.  
56 multicenter study.pt.  
57 clinical trial.pt.  
58 exp Clinical Trials as Topic/  
59 or/44-58  
60 (clinical adj trial\$.tw.  
61 ((singl\$ or doubl\$ or trebl\$ or tripl\$) adj (blind\$3 or mask\$3)).tw.  
62 PLACEBOS/  
63 placebo\$.tw.  
64 randomly allocated.tw.  
65 (allocated adj2 random\$.tw.  
66 or/60-65  
67 59 or 66  
68 case report.tw.  
69 letter/  
70 exp Historical article/  
71 or/68-70  
72 67 not 71  
73 43 and 72

**Table S1: Excluded studies with reasons**

| <b>First Author</b> | <b>Year</b> | <b>Reason(s) for Exclusion</b>          |
|---------------------|-------------|-----------------------------------------|
| Azhari              | 2005        | Unable to retrieve full text            |
| Bharati             | 2016        | Not RCT                                 |
| Choudhary           | 2013        | Not RCT                                 |
| Dehghan Manshadi    | 2008        | Not RCT                                 |
| Fotokian            | 2008        | Incorrect outcome measure               |
| Ghanbari            | 2008        | Not RCT                                 |
| Hippensteel         | 1989        | Not RCT                                 |
| Janda               | 2015        | Not RCT                                 |
| Jang                | 2004        | Not exercise                            |
| Karimian            | 2006        | Unable to retrieve full text            |
| Koons               | 1999        | Not exercise                            |
| Lemos               | 1991        | Comparison of two interventions         |
| Luoto               | 2012        | Not PMS                                 |
| Maged               | 2018        | Incorrect outcome measure               |
| Nikbakht            | 2007        | Unable to retrieve full text            |
| Noor                | 2015        | Intervention duration too short         |
| Omidali             | 2015a       | Intervention duration too short         |
| Omidali             | 2015b       | Intervention duration too short         |
| Omidali             | 2016a       | Intervention duration too short         |
| Omidali             | 2016b       | Intervention duration too short         |
| Parkhad Suchitra    | 2013        | Not PMS                                 |
| Pearlstein          | 1992        | Intervention duration too short         |
| Prior               | 1986        | Not RCT, non-exclusion of diabetics     |
| Prior               | 1987        | Not RCT, non-exclusion of diabetics     |
| Rahimi              | 2018        | No reply from author, unpublished paper |
| Rani                | 2011a       | Not PMS                                 |
| Rani                | 2011b       | Not PMS                                 |
| Rani                | 2016        | Not PMS                                 |
| Ruprai              | 2015        | Not RCT                                 |
| Sabaei              | 2015        | Not RCT                                 |
| Sevimli             | 2012        | Intervention duration too short         |
| Sharma              | 2013        | Incorrect outcome measure               |
| Sridvei             | 1996        | Not RCT                                 |
| Vishnupriya         | 2011        | Intervention duration too short         |
| Weitzman            | 1993        | Unable to retrieve full text            |
| Yonglitthipagon     | 2016        | Incorrect outcome measure               |
| Zoodfekr            | 2018        | Incorrect outcome measure               |

**Figure S2: Forest plot for secondary outcome: Exercise versus control for psychological symptom reduction**

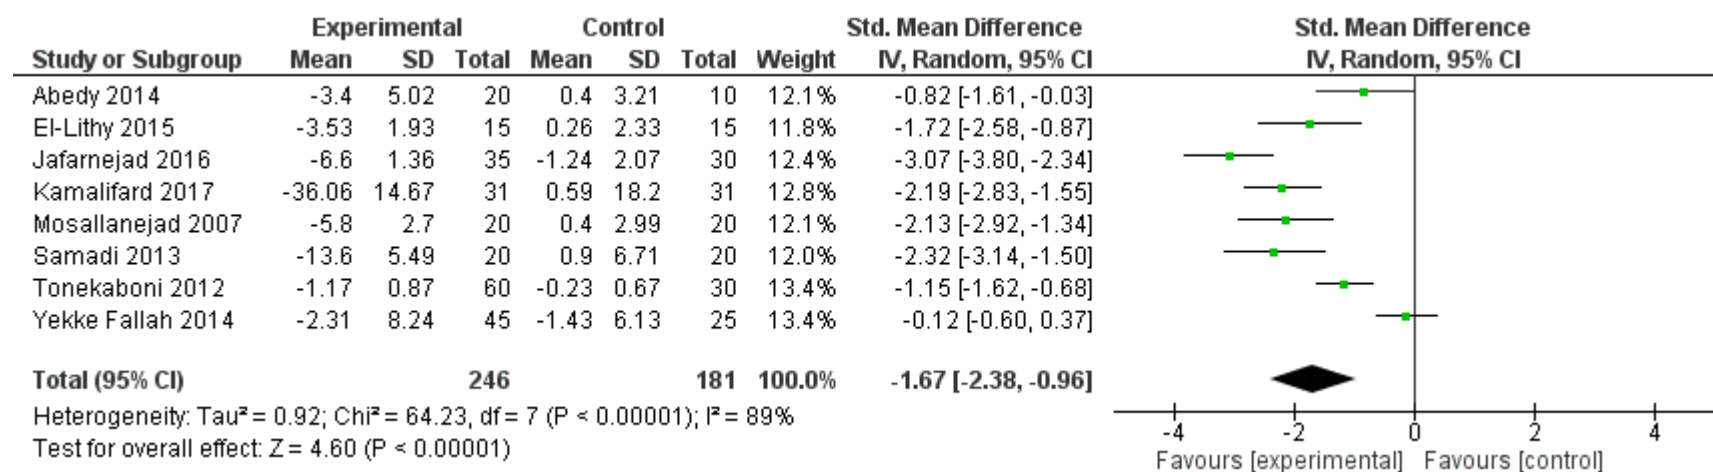

**Figure S3: Forest plot for secondary outcome: Exercise versus control for physical symptom reduction**

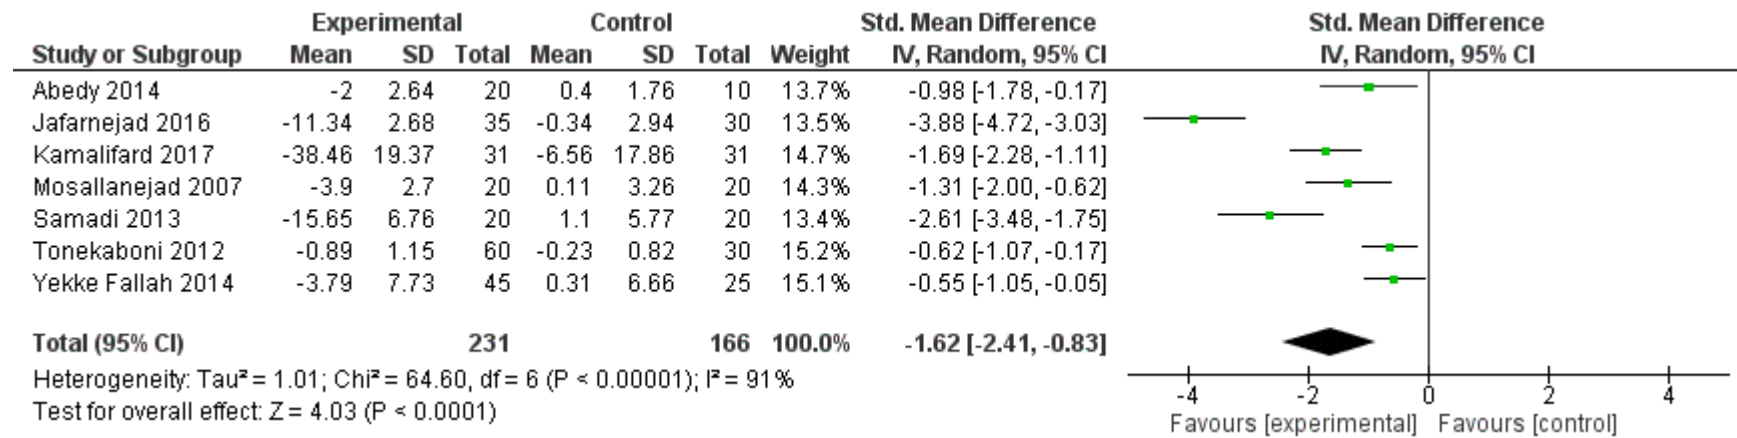

**Figure S4: Forest plot for secondary outcome: Exercise versus control for behavioural symptom reduction**

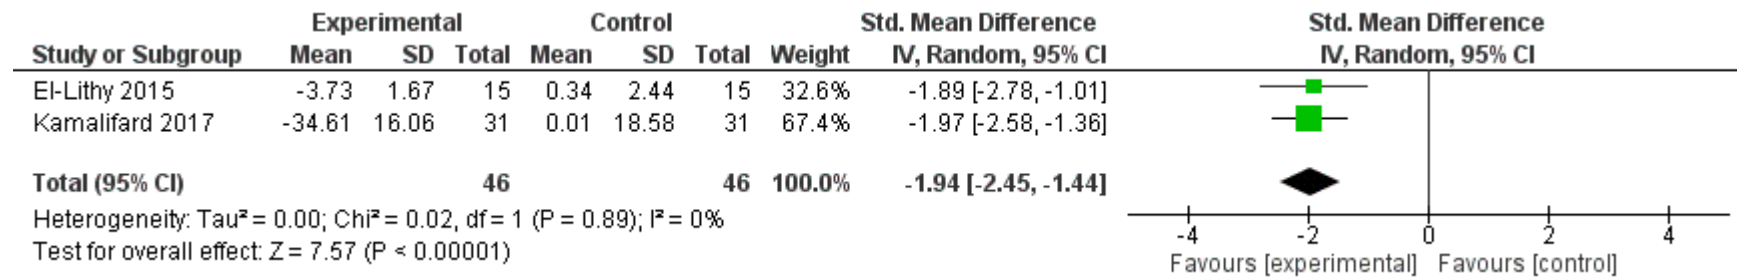

Supplement: bjgpopen20X101032_Supp.pdf [file bjgpopen20X101032_Supp.pdf]
